# Supplementary material
Source: PubMed Central journal article supplement (PMC8205235)
Supplement: pt1c00064_si_001.pdf [file pt1c00064_si_001.pdf]

## Supporting Information for

### Small Molecule Inhibitors of Activation-Induced Deaminase Decrease Class Switch Recombination in B Cells

Juan Alvarez-Gonzalez,<sup>1,9</sup> Adam Yasgar,<sup>2,9</sup> Robert W. Maul,<sup>1</sup> Amanda E. Rieffer,<sup>3-5</sup> Daniel J. Crawford,<sup>6,10</sup> Daniel J. Salamango,<sup>3-5,11</sup> Dorjbal Dorjsuren,<sup>2</sup> Alexey V. Zakharov,<sup>2</sup> Daniel Jansen,<sup>2</sup> Ganesha Rai,<sup>2</sup> Juan Marugan,<sup>2</sup> Anton Simeonov,<sup>2</sup> Reuben S. Harris,<sup>3-5,7</sup> Rahul M. Kohli,<sup>6</sup> and Patricia J. Gearhart<sup>1,8,\*</sup>

<sup>1</sup> Laboratory of Molecular Biology and Immunology, National Institute on Aging, National Institutes of Health, Baltimore, MD 21224, USA

<sup>2</sup> National Center for Advancing Translational Sciences, National Institutes of Health, Rockville, MD 20816, USA

<sup>3</sup> Department of Biochemistry, Molecular Biology and Biophysics, University of Minnesota, Minneapolis, MN 55455, USA

<sup>4</sup> Masonic Cancer Center, University of Minnesota, Minneapolis, MN 55455, USA

<sup>5</sup> Institute for Molecular Virology, University of Minnesota, Minneapolis, MN 55455, USA

<sup>6</sup> Department of Medicine, University of Pennsylvania, Philadelphia, PA 19104, USA

<sup>7</sup> Howard Hughes Medical Institute, University of Minnesota, Minneapolis, MN 55455, USA

<sup>8</sup> Lead Contact

<sup>9</sup> Contributed equally

\*Corresponding author: [gearhartp@mail.nih.gov](mailto:gearhartp@mail.nih.gov)

#### Contents

Supplemental Figures S1-S5

Supplemental Tables S1-S5

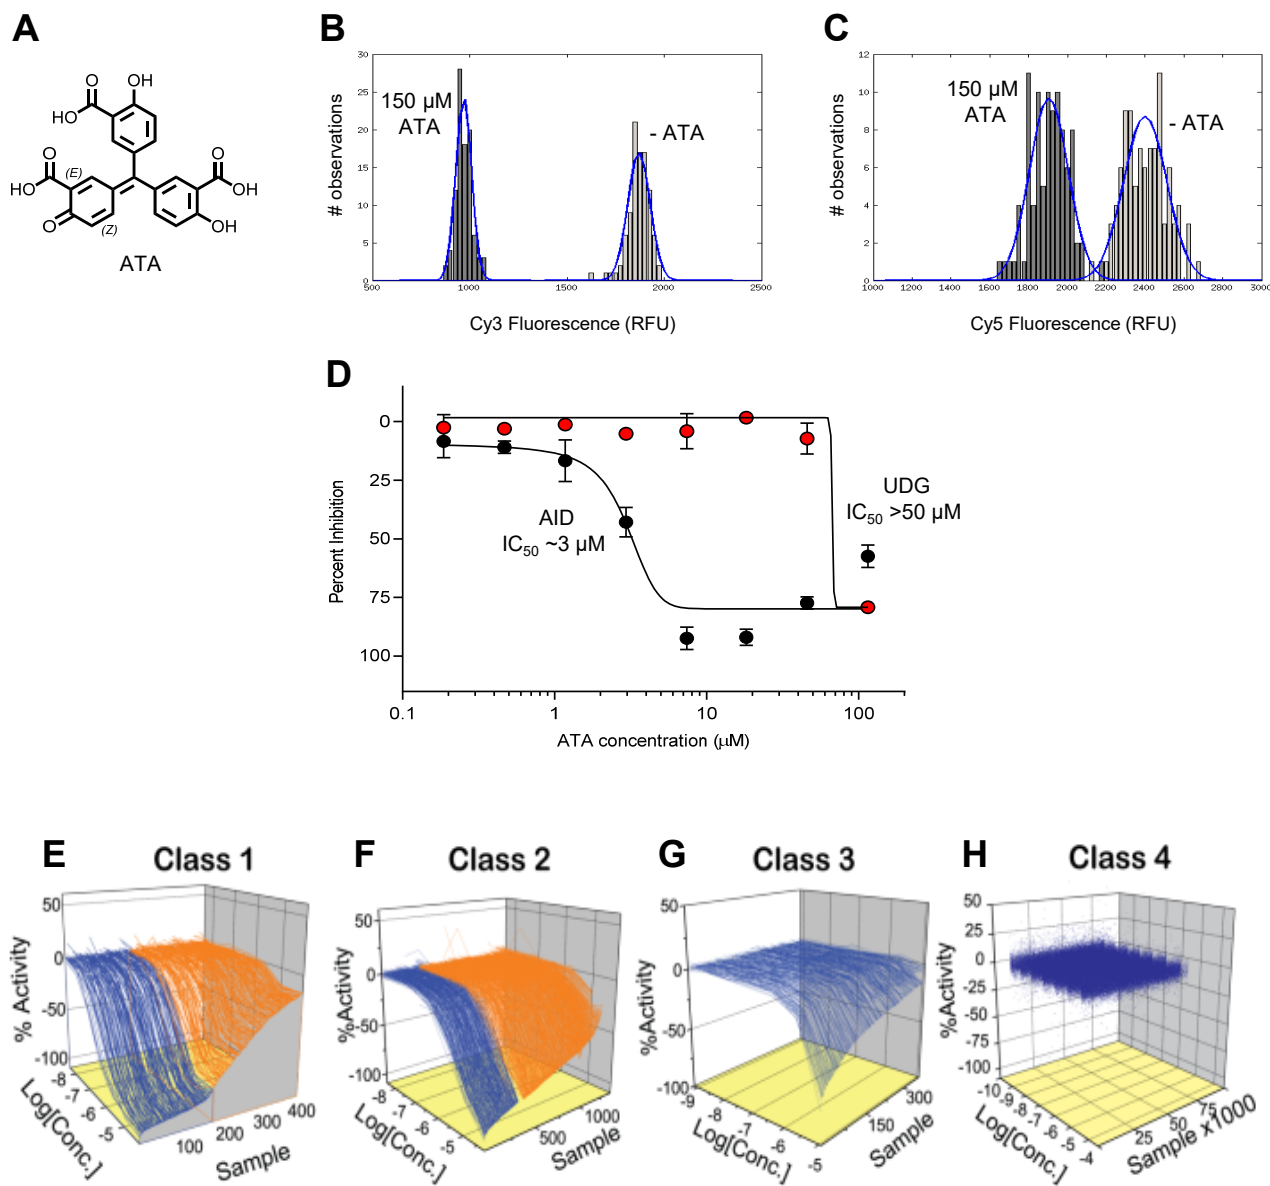

**Figure S1.** Assay optimization (A-D) and compound triage (E-H). (A) Structure of ATA, a non-specific inhibitor of protein-nucleic acid binding. (B) Histogram of Cy3 fluorescence showing AID-specific deaminase activity when either incubated with 150  $\mu\text{M}$  ATA (N=96; dark gray) or uninhibited (N=96; light gray), indicating AID inhibition with a  $Z'$ =0.7. (C) Histogram of Cy5 fluorescence indicating UDG-specific glycosylase activity when either incubated with 150  $\mu\text{M}$  ATA inhibition (N=96; dark gray) or uninhibited (N=96; light gray), indicating poor UDG inhibition with a  $Z'$ <0. (D) Titration curves show separate  $\text{IC}_{50}$  values for both oligonucleotides. Red, UDG; black, AID. (E) Classes 1.1 (blue; >80% efficacy) and 1.2 (orange;  $\leq$ 80% efficacy) inhibitors display full and partial activity, respectively, with  $r_2 \geq 0.9$ . (F) Classes 2.1 (blue; >80% efficacy,  $r_2 > 0.9$ ) and 2.2 (orange;  $\leq$ 80% efficacy,  $r_2 < 0.9$ ) inhibitors have incomplete curves for inhibitors with  $\text{IC}_{50}$  values within and beyond the tested titration range. (G) Class 3 inhibitors have incomplete inhibitory (blue) curves that show weak activity and poor fits. (H) Class 4 compounds are inactive.

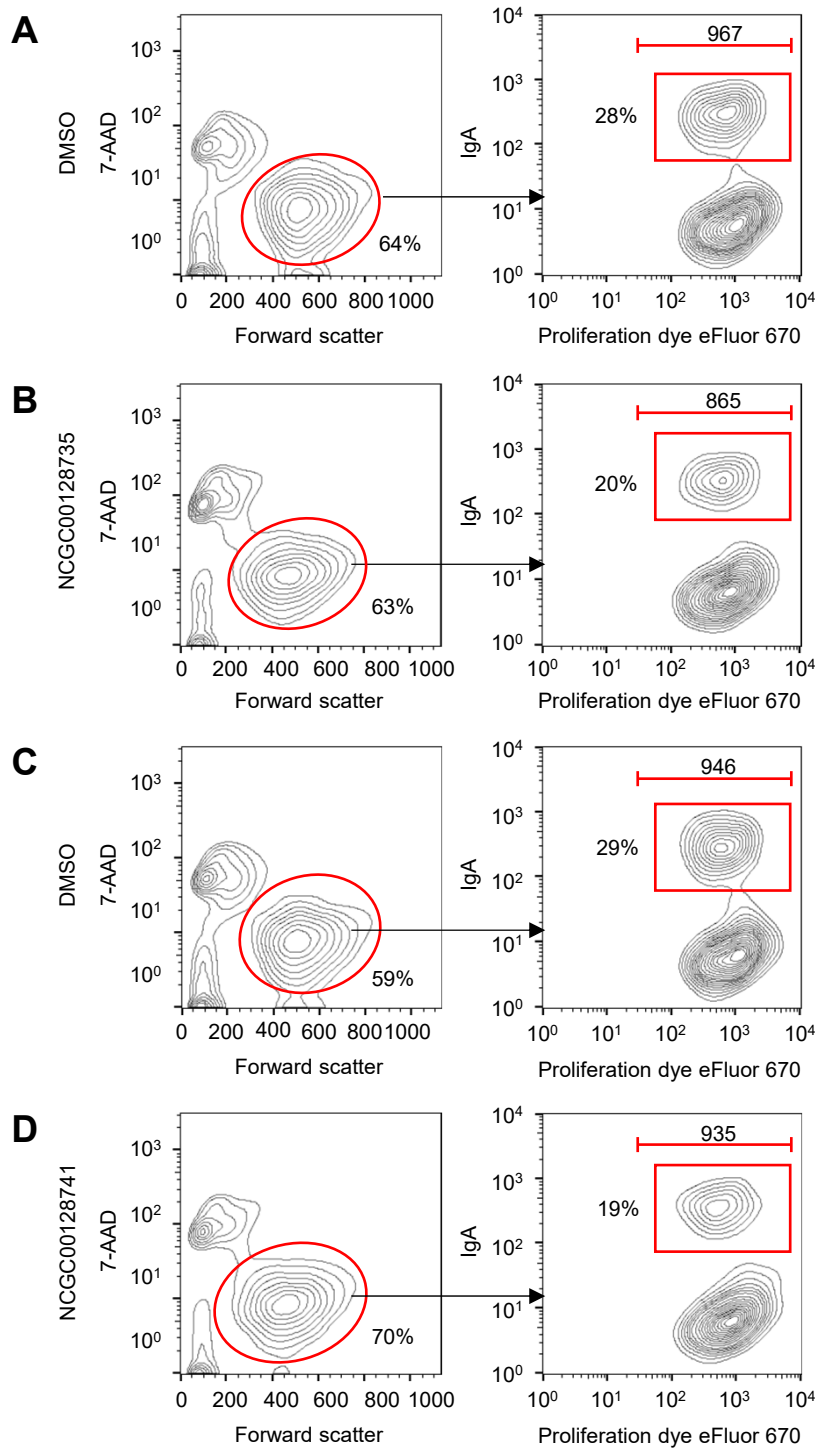

**Figure S2.** Representative FACS plots of CH12 B cells 72 hrs after stimulation. All samples were cultured in 0.1% DMSO final concentration. Red circle shows the gating of live lymphocytes. Red square shows the percentage of IgA<sup>+</sup> B cells. Red bar shows the area used and value of mean fluorescence of proliferation dye. (A) and (B), DMSO control and 10  $\mu$ M NCGC00128735. (C) and (D), DMSO control and 10  $\mu$ M NCGC00128741.

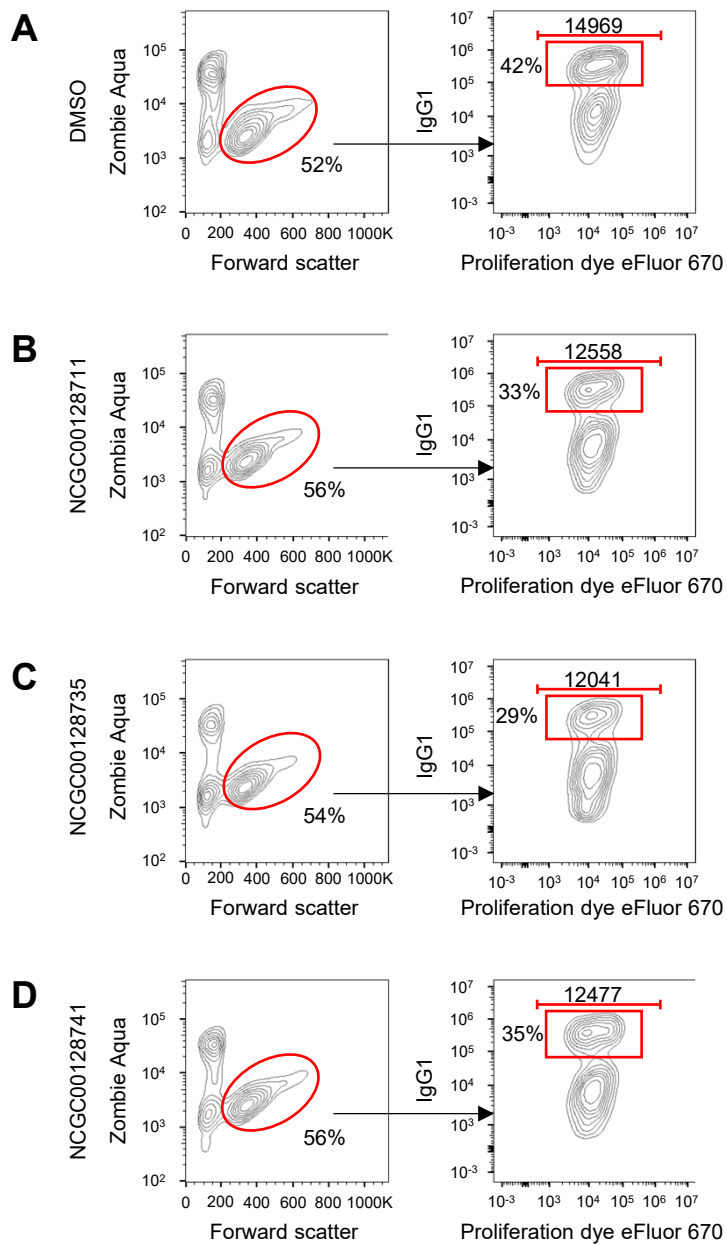

**Figure S3.** Representative FACS plots of splenic B cells 72 hrs after stimulation. All samples were cultured in 0.1% DMSO final concentration. Red circle shows the gating of live lymphocytes. Red square shows the percentage of IgG1<sup>+</sup> B cells. Red bar shows the area used and value of mean fluorescence of proliferation dye. (A) DMSO control. (B), (C), and (D) 10  $\mu$ M inhibitor.

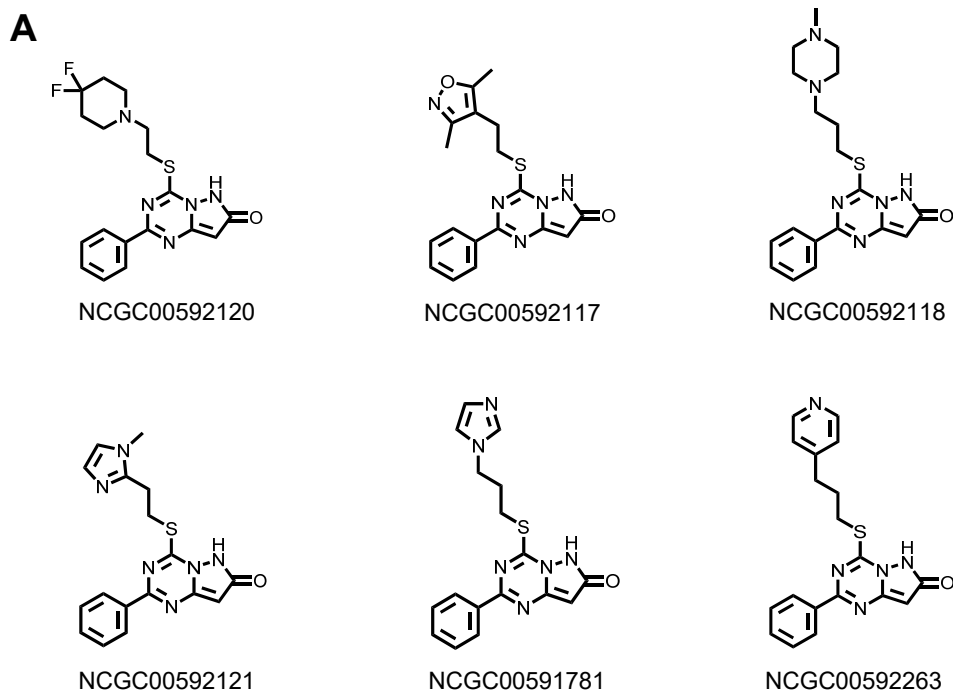

**B**

| Compound ID          | Solubility<br>( $\mu\text{g/mL}$ ) | PAMPA pH 7.4<br>( $10^{-6}$ cm/s) | Rat liver microsome<br>stability ( $t_{1/2}$ ; min) |
|----------------------|------------------------------------|-----------------------------------|-----------------------------------------------------|
| NCGC00128735 (known) | < 1                                | < 10                              | > 30                                                |
| NCGC00128741 (known) | < 1                                | 9                                 | not found                                           |
| NCGC00592120         | 11.9                               | 104                               | 8.3                                                 |
| NCGC00592117         | 13.4                               | 116                               | 12                                                  |
| NCGC00592118         | > 57                               | 54                                | > 30                                                |
| NCGC00592121         | 33.4                               | 136                               | > 30                                                |
| NCGC00591781         | 25.1                               | 13                                | > 30                                                |
| NCGC00592263         | 5.1                                | 191                               | 13.8                                                |

**Figure S4.** Analogs that tested negative in deamination assays. (A) Compounds tested negative at 100  $\mu\text{M}$  by the in vitro deamination assay and at 10  $\mu\text{M}$  in the ex vivo CSR assay, although they were not toxic to B cells. (B) Solubility, membrane permeability, and microsome stability measurements of 2 known inhibitors compared to 6 new analogs. .

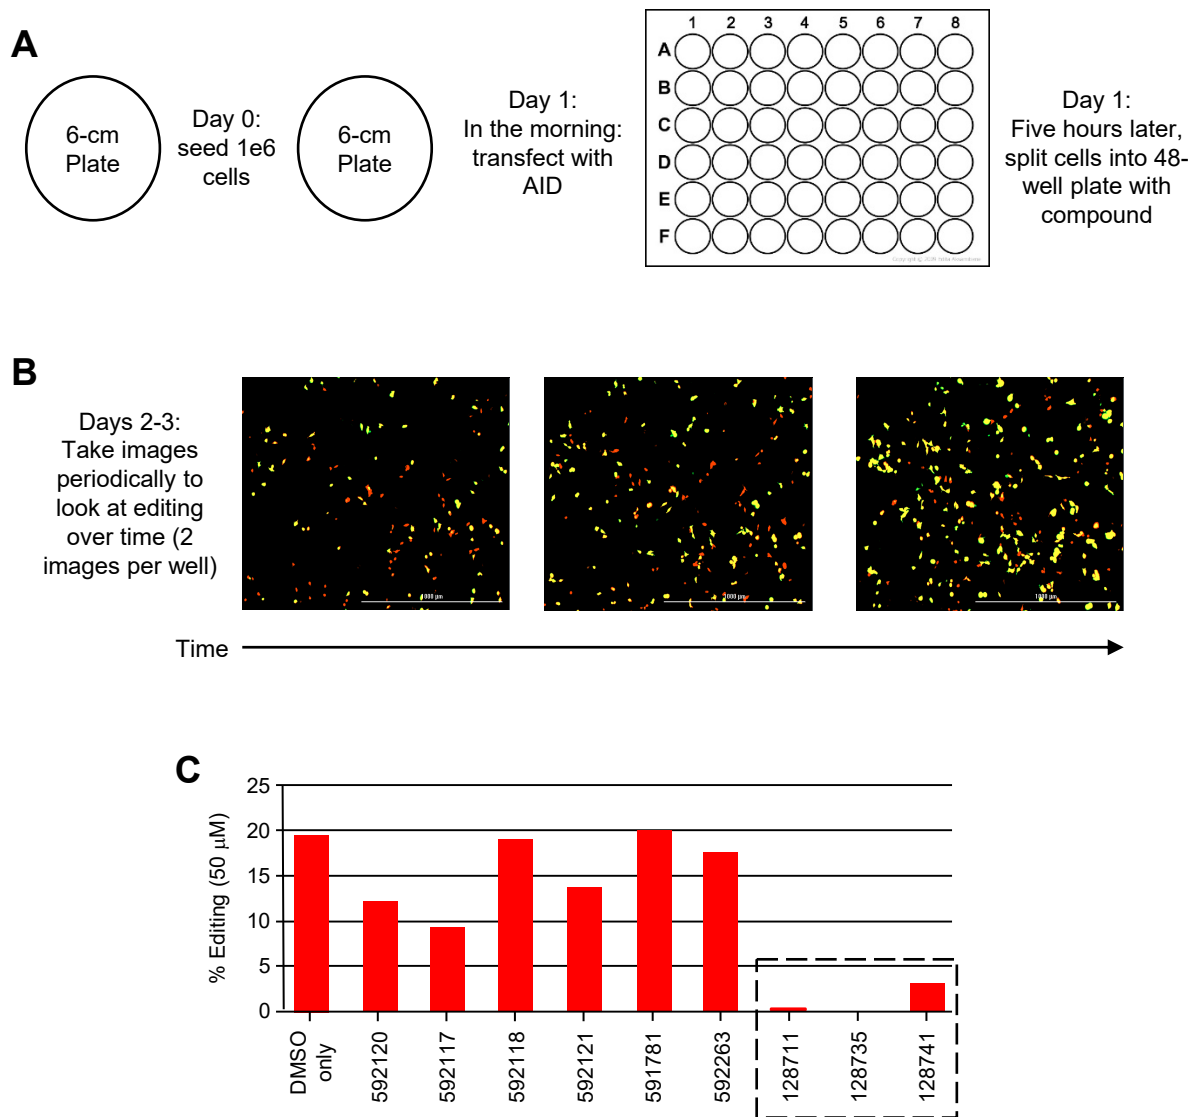

**Figure S5.** AID drug inhibition assay. (A) One million 293T cells were seeded and transfected with reporter and AID one day later. (B) Fluorescent images were collected over time. Red depicts mCherry transfected cells; green shows transfected cells with edited eGFP reporter. Note editing increases with time. (C) Inhibition of AID editing by 6 negative analogs and 3 positive compounds (boxed) at 50  $\mu$ M.
